# Supplementary material for: Life-cycle net energy assessment of large-scale hydrogen production via photoelectrochemical water splitting
Source: Royal Society of Chemistry journal article supplement (doi:10.1039/c4ee01019a), 2014-01-01
Supplement: c4ee01019a1.pdf [file c4ee01019a1.pdf]

## Electronic Supplementary Information

### Life-cycle net energy assessment of large-scale hydrogen production via photoelectrochemical water splitting

Roger Sathre, Corinne D. Scown, William R. Morrow III, John C. Stevens, Ian D. Sharp, Joel W. Ager, Karl Walczak, Frances A. Houle, Jeffery B. Greenblatt

<http://dx.doi.org/10.1039/C4EE01019A>

#### Tables

**Table S1.** Low, base-case, and high values of system model parameters. Low values result in reduced system performance relative to the base-case, while high values result in improved system performance.

| Parameter description                         | Units               | Low   | Base-case | High  |
|-----------------------------------------------|---------------------|-------|-----------|-------|
| <b>System</b>                                 |                     |       |           |       |
| Capacity factor of facility                   | percent             | 80%   | 90%       | 95%   |
| Primary energy-to-electricity conversion      | percent             | 40%   | 50%       | 60%   |
| Life span of balance of system                | years               | 20    | 40        | 60    |
| Decommissioning energy                        | percent             | 20%   | 10%       | 5%    |
| <b>PEC cell</b>                               |                     |       |           |       |
| Solar-to-hydrogen efficiency                  | percent             | 5%    | 10%       | 20%   |
| Life span of PEC cell                         | years               | 5     | 10        | 20    |
| Cell degradation threshold                    | percent             | 70%   | 80%       | 90%   |
| Transmittance loss (dust, glass, electrolyte) | percent             | 20%   | 10%       | 5%    |
| Photo-active cell materials energy use        | MJ m <sup>-2</sup>  | 23    | 14        | 5     |
| Other cell materials energy use               | MJ m <sup>-2</sup>  | 1227  | 692       | 469   |
| Photo-active cell fabrication energy use      | MJ m <sup>-2</sup>  | 1668  | 1001      | 715   |
| Other cell fabrication energy use             | MJ m <sup>-2</sup>  | 517   | 407       | 359   |
| Electrolyte energy intensity                  | multiplier          | 1.5   | 1.0       | 0.8   |
| <b>Panel</b>                                  |                     |       |           |       |
| Panel inactive area                           | percent             | 10%   | 5%        | 2%    |
| Panel material use                            | multiplier          | 1.2   | 1.0       | 0.8   |
| Panel material energy intensity               | multiplier          | 1.2   | 1.0       | 0.8   |
| Panel internal frame spacing                  | meter               | 0.5   | 1.0       | 1.5   |
| Panel transport (truck and train)             | kilometer           | 1300  | 300       | 0     |
| Containment vessel thickness                  | meter               | 0.008 | 0.004     | 0.002 |
| Containment vessel material energy            | multiplier          | 1.5   | 1.0       | 0.8   |
| <b>Piping</b>                                 |                     |       |           |       |
| Maximum velocity, uncompressed H <sub>2</sub> | m sec <sup>-1</sup> | 0.5   | 1.0       | 2.0   |
| Maximum velocity, compressed H <sub>2</sub>   | m sec <sup>-1</sup> | 20    | 40        | 60    |
| Maximum velocity, H <sub>2</sub> O            | m sec <sup>-1</sup> | 1.0   | 3.0       | 5.0   |
| Material energy intensity                     | multiplier          | 1.2   | 1.0       | 0.8   |
| Allowance for valves and fittings             | percent             | 50%   | 25%       | 10%   |
| Pipe transport (train)                        | kilometer           | 3000  | 1000      | 300   |
| <b>Gas handling</b>                           |                     |       |           |       |
| Panels per blower                             | units               | 50    | 100       | 150   |

|                                       |                                          |        |        |        |
|---------------------------------------|------------------------------------------|--------|--------|--------|
| Gas blower power                      | kW                                       | 3.0    | 1.5    | 0.7    |
| Gas blower average use                | percent of capacity                      | 100%   | 75%    | 50%    |
| Gas dryer power                       | kW                                       | 5.0    | 2.4    | 1.4    |
| Gas dryer average use                 | percent of capacity                      | 100%   | 75%    | 50%    |
| Compressor specific energy use        | W h m <sup>-3</sup>                      | 82     | 70     | 57     |
| Compressor interstage loss            | psi                                      | 10     | 5      | 0      |
| Gas intake temperature                | degree C                                 | 80     | 60     | 40     |
| Compressor fan load                   | percent                                  | 10%    | 7.5%   | 5%     |
| Gas handling hardware embodied energy | multiplier                               | 2.0    | 1.0    | 0.5    |
| <b>Storage</b>                        |                                          |        |        |        |
| Gas storage capacity                  | day                                      | 2.0    | 1.0    | 0.5    |
| Allowable stress in tank wall         | multiplier                               | 0.8    | 1.0    | 1.2    |
| Corrosion allowance                   | mm                                       | 12     | 9      | 6      |
| Allowance for valves and fittings     | percent                                  | 20%    | 10%    | 5%     |
| <b>Water</b>                          |                                          |        |        |        |
| Water treatment electricity           | MJ ton <sup>-1</sup> of treated water    | 43.1   | 21.5   | 16.1   |
| Water treatment brine waste           | liter ton <sup>-1</sup> of treated water | 774    | 387    | 71     |
| Water use for panel cleaning          | liter m <sup>-2</sup> year <sup>-1</sup> | 100    | 25     | 10     |
| Water transport electricity           | kWh m <sup>-3</sup> km <sup>-1</sup>     | 0.0073 | 0.0047 | 0.0018 |
| <b>Roads</b>                          |                                          |        |        |        |
| Road width                            | meter                                    | 8      | 6      | 4      |
| Asphalt thickness                     | meter                                    | 0.10   | 0.05   | 0.03   |
| Subbase thickness                     | meter                                    | 0.30   | 0.15   | 0.08   |
| Percent bitumen in asphalt            | percent                                  | 6%     | 5%     | 4%     |
| Material energy intensity             | multiplier                               | 1.2    | 1.0    | 0.8    |
| <b>Operations</b>                     |                                          |        |        |        |
| Number of trucks and cranes           | units                                    | 12     | 6      | 3      |
| Horsepower of engines                 | brake hp                                 | 600    | 400    | 200    |
| Daily operating time                  | hours                                    | 24     | 12     | 8      |
| Equipment load factor                 | ratio                                    | 0.70   | 0.54   | 0.38   |
| Panel heat requirement                | kWh m <sup>-2</sup> year <sup>-1</sup>   | 11.1   | 5.4    | 0.5    |

**Table S2.** Mass (kg) of panel components

| Component                 | Mass (kg) | Notes                                                                                                                                  |
|---------------------------|-----------|----------------------------------------------------------------------------------------------------------------------------------------|
| Structure                 | 340       | Perimeter frame of steel channel section (ASTM C4x5.4), with internal elements of steel angle section (ASTM L2½x2x3/16) spaced at 1 m. |
| P5 piping                 | 7         |                                                                                                                                        |
| PVC cell chamber          | 163       | Based on Zhai <i>et al.</i> <sup>28</sup>                                                                                              |
| Glass cover               | 207       | Based on Zhai <i>et al.</i> <sup>28</sup>                                                                                              |
| PEC cell elements         | 4         | Based on Zhai <i>et al.</i> <sup>28</sup>                                                                                              |
| Electrolyte               | 569       | 1M H <sub>2</sub> SO <sub>4</sub> , assume density of 1.045 kg m <sup>-3</sup>                                                         |
| Total                     | 1290      |                                                                                                                                        |
| Total without electrolyte | 721       |                                                                                                                                        |

**Table S3.** Characteristics of modeled PEC cells (Source: Zhai *et al.* <sup>28</sup>)

| Category         | Component                                                                               | Lower case                           | Medium case                          | Higher case             |
|------------------|-----------------------------------------------------------------------------------------|--------------------------------------|--------------------------------------|-------------------------|
| Material choices | Photocathode                                                                            | Silicon (Si)                         | Silicon (Si)                         | Silicon (Si)            |
|                  | Photoanode                                                                              | Tungsten trioxide (WO <sub>3</sub> ) | Tungsten trioxide (WO <sub>3</sub> ) | Gallium arsenide (GaAs) |
|                  | Catalysts for photocathode                                                              | Cobalt (Co)                          | Platinum (Pt)                        | Platinum (Pt)           |
|                  | Catalysts for photoanode                                                                | No catalyst                          | No catalyst                          | Platinum (Pt)           |
|                  | Encapsulation                                                                           | Polyvinyl chloride (PVC)             | Polyvinyl chloride (PVC)             | Polycarbonate           |
|                  | Thickness of chamber                                                                    | 3 mm                                 | 5 mm                                 | 7 mm                    |
|                  | Thickness of membrane                                                                   | 30 µm                                | 50 µm                                | 70 µm                   |
| Fabrication      | Thermodynamic efficiency of processes used to fabricate photocathode/anode and membrane | 70%                                  | 50%                                  | 30%                     |

**Table S4.** Characteristics of base-case pipe levels P0 through P5 for H<sub>2</sub>, O<sub>2</sub> and H<sub>2</sub>O. Shaded pipe sizes are determined by minimum size (nominal ½ inch), not flow properties.

|                               |                      | P0      | P1      | P2      | P3      | P4      | P5      |
|-------------------------------|----------------------|---------|---------|---------|---------|---------|---------|
| <b>Length</b>                 | km                   | 300     | 15      | 144     | 1891    | 14385   | 21752   |
| <b>Maximum velocity</b>       | m sec <sup>-1</sup>  |         |         |         |         |         |         |
| H2                            |                      | 40      | 40      | 40      | 1       | 1       | <<1     |
| O2                            |                      | 40      | 40      | 40      | 1       | 1       | <<1     |
| H2O                           |                      | 3       | 3       | 3       | 3       | 3       | <<3     |
| <b>Flow rate</b>              | kg sec <sup>-1</sup> |         |         |         |         |         |         |
| H2                            |                      | 8.0     | 2.0     | 0.33    | 0.0045  | 0.00004 | <<      |
| O2                            |                      | 63      | 16      | 2.6     | 0.035   | 0.00035 | <<      |
| H2O                           |                      | 142     | 18      | 3.0     | 0.040   | 0.00040 | <<      |
| <b>Pipe interior diameter</b> | inch                 |         |         |         |         |         |         |
| H2                            |                      | 14      | 7.2     | 2.9     | 10      | 1.0     | 0.62    |
| O2                            |                      | 10      | 5.1     | 2.1     | 7.3     | 0.73    | 0.62    |
| H2O                           |                      | 9.7     | 3.4     | 1.4     | 0.62    | 0.62    | 0.62    |
| <b>Pipe material</b>          |                      |         |         |         |         |         |         |
| H2                            |                      | PVC S80 | PVC S80 | PVC S80 | PVC S40 | PVC S40 | PVC S40 |
| O2                            |                      | PVC S80 | PVC S80 | PVC S80 | PVC S40 | PVC S40 | PVC S40 |
| H2O                           |                      | PVC S40 |

**Table S5.** Annual electricity requirement for panel heating to prevent freezing. The separate and combined effects of several possible design and operation conditions were assessed to estimate a likely range for the annual heating energy input. These were 1) to vary the minimum allowable temperature of the electrolyte from 0 °C to -2.5 °C; 2) to reduce the thermal radiation energy losses by reducing the emissivity of the window material from 0.94 to 0.8 using an optical coating; and 3) to add an additional 2 cm layer of R12 polystyrene insulation to the back of the device. Results indicate that variation of local climate has greater effect on panel heating energy than does variation of these conditions. The base-case conditions (shown in bold font in the table) assume a -2.5 °C temperature threshold, no insulation, and no low-emissivity coating.

| Conditions            |             |                        | Heating energy (kWh m <sup>-2</sup> year <sup>-1</sup> ) |            |            |            |
|-----------------------|-------------|------------------------|----------------------------------------------------------|------------|------------|------------|
| Temperature threshold | Insulation  | Low-emissivity coating | Barstow                                                  | Phoenix    | Las Vegas  | Tucson     |
| <b>-2.5 °C</b>        | <b>none</b> | <b>none</b>            | <b>11.0</b>                                              | <b>0.6</b> | <b>6.1</b> | <b>4.2</b> |
| 0 °C                  | none        | none                   | 23.9                                                     | 3.1        | 16.1       | 14.0       |
| 0 °C                  | 2 cm R12    | none                   | 19.1                                                     | 3.8        | 13.6       | 12.5       |
| 0 °C                  | none        | top emissivity = 0.8   | 18.9                                                     | 1.4        | 12.7       | 10.9       |
| -2.5 °C               | none        | top emissivity = 0.8   | 7.4                                                      | 0.4        | 3.8        | 3.1        |

Figures

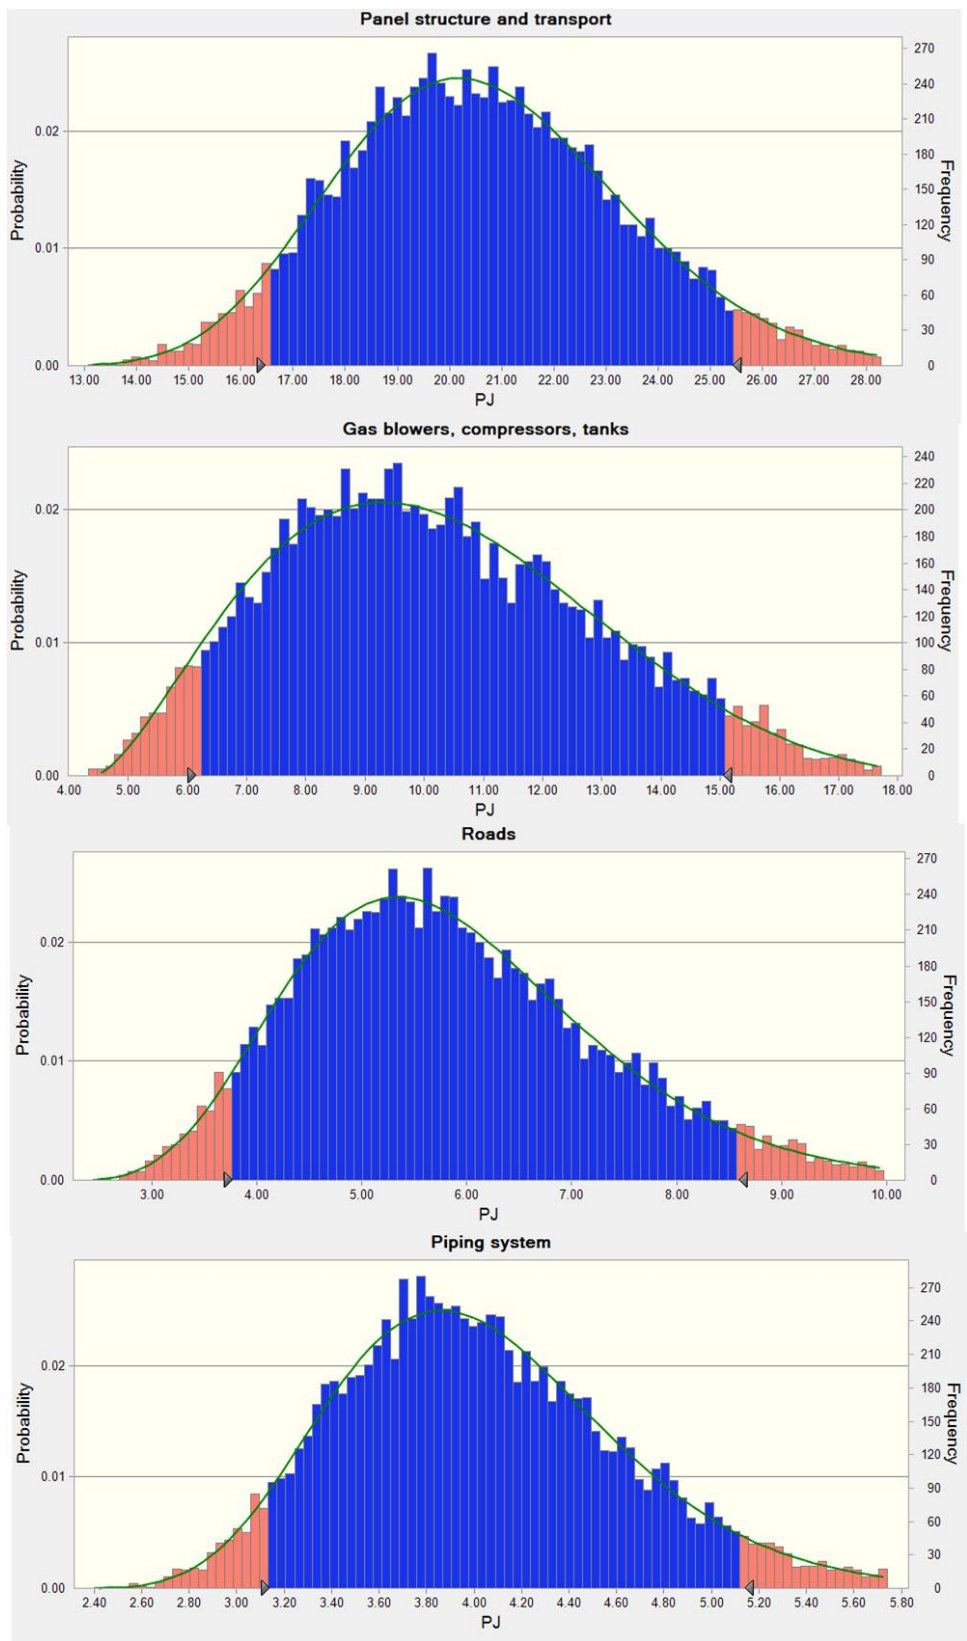

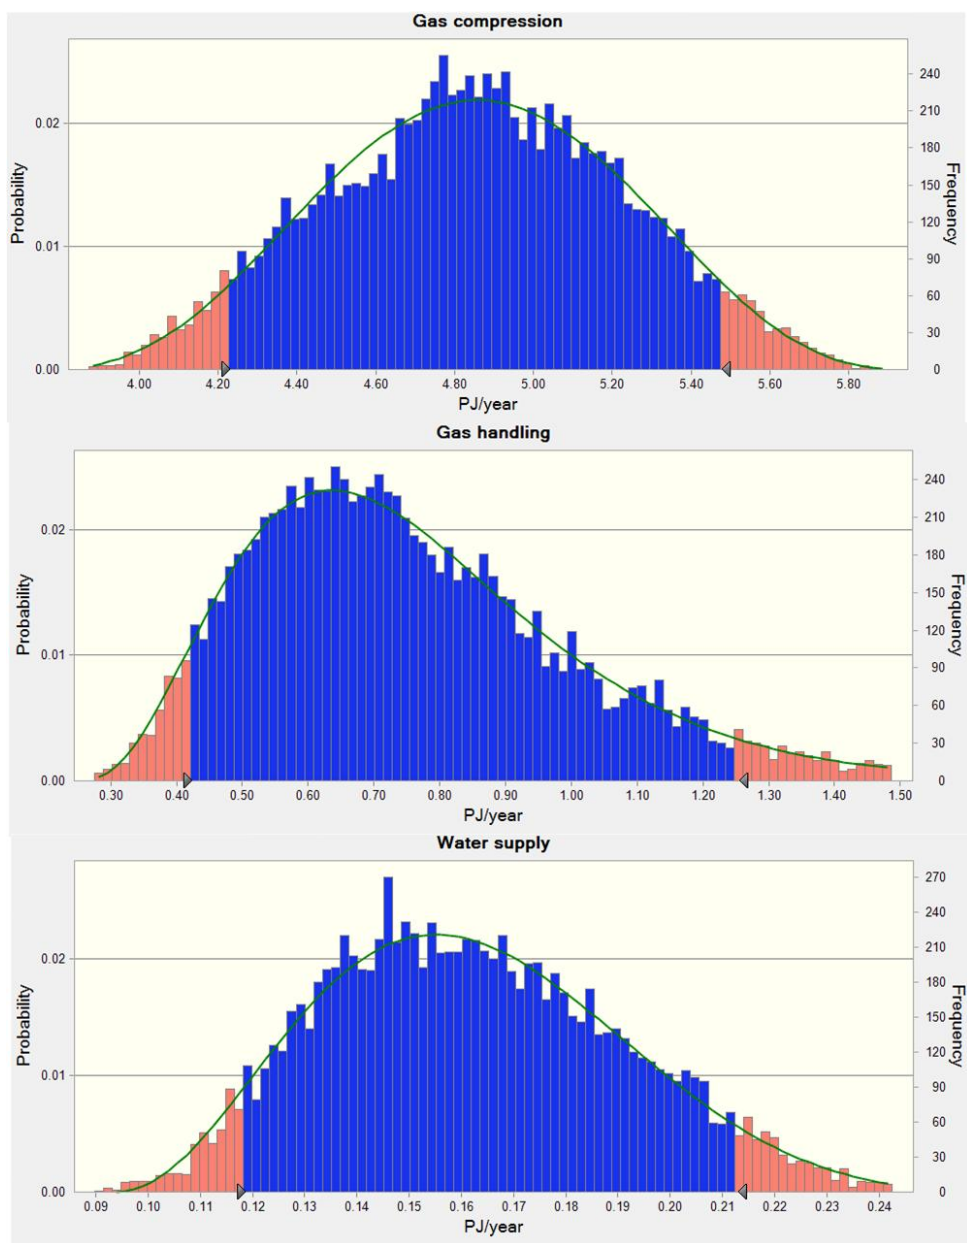

**Figure S1.** Outcomes of Monte Carlo simulations of parameter categories. Facility production energy use (top) is in units of PJ, and facility operation energy use (bottom) is in units of PJ year<sup>-1</sup>.

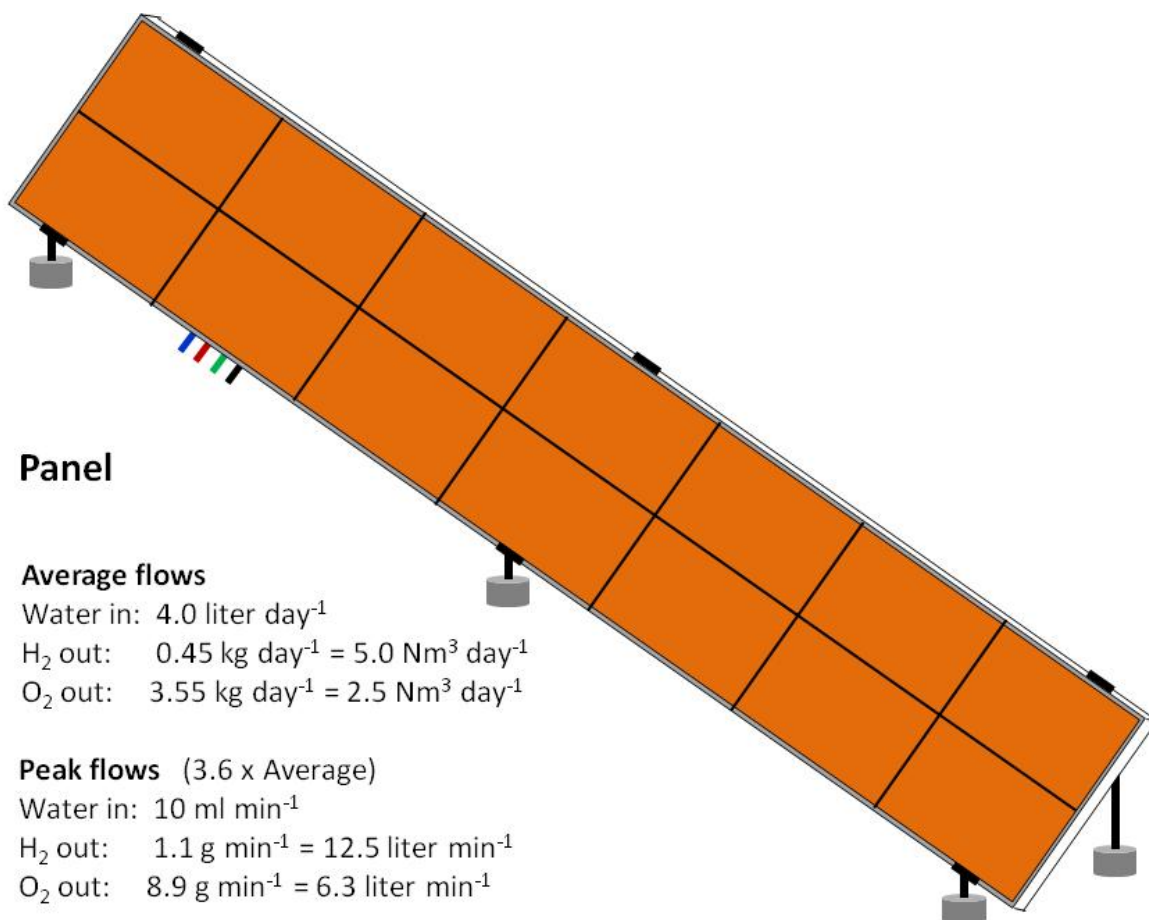

**Figure S2.** PEC panel with dimensions of 12.0 m long and 2.4 m wide. Flow rates are based on base-case conditions, and do not include water vapor lost with vented O<sub>2</sub>.

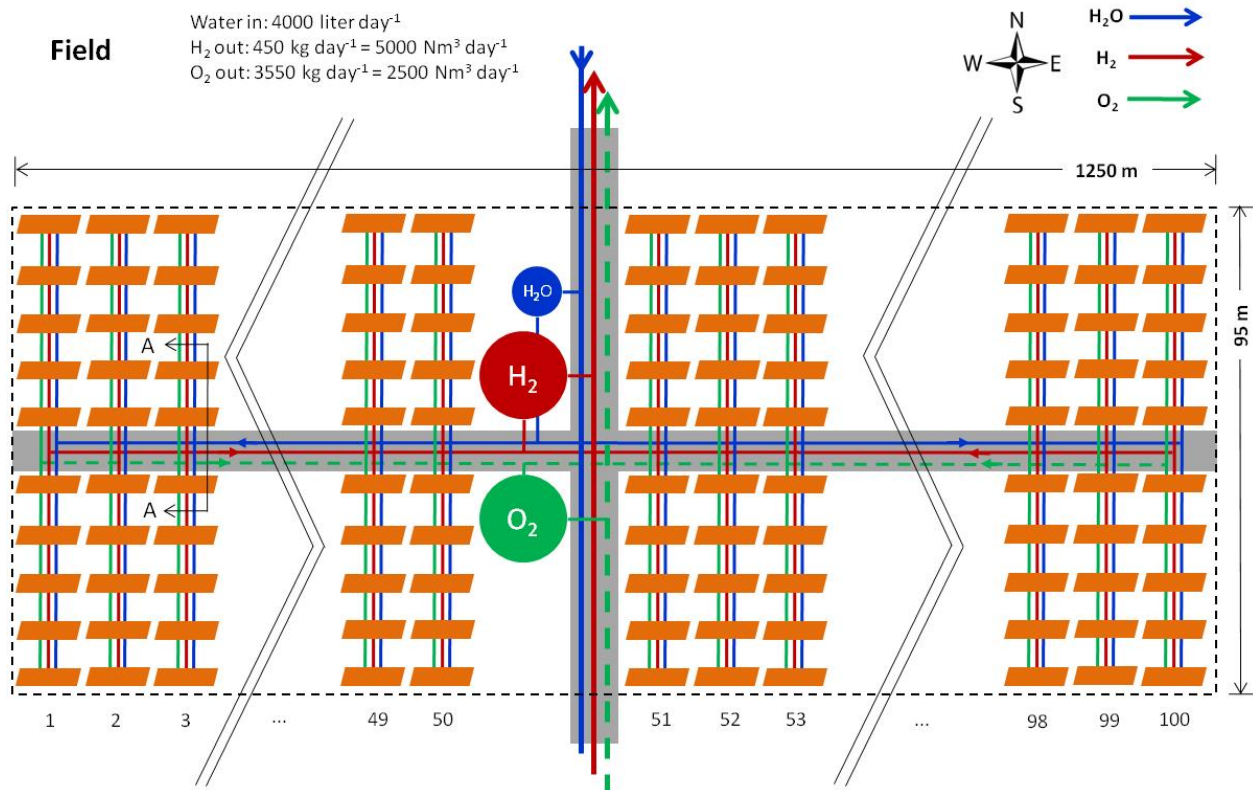

**Figure S3.** Diagram of a PEC field, comprising 1000 panels (100 rows of ten panels) plus compression and storage equipment for one day's production of H<sub>2</sub> (and O<sub>2</sub>, if collected). Water flow rates do not include water vapor lost with vented O<sub>2</sub>.

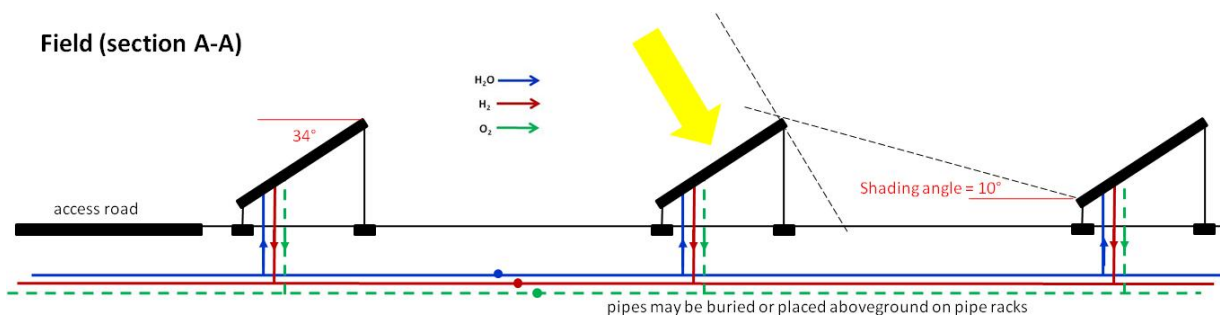

**Figure S4.** Cross sectional diagram of a PEC field, showing geometry of panel layout. Section A-A corresponds to indicator on Figure S3.



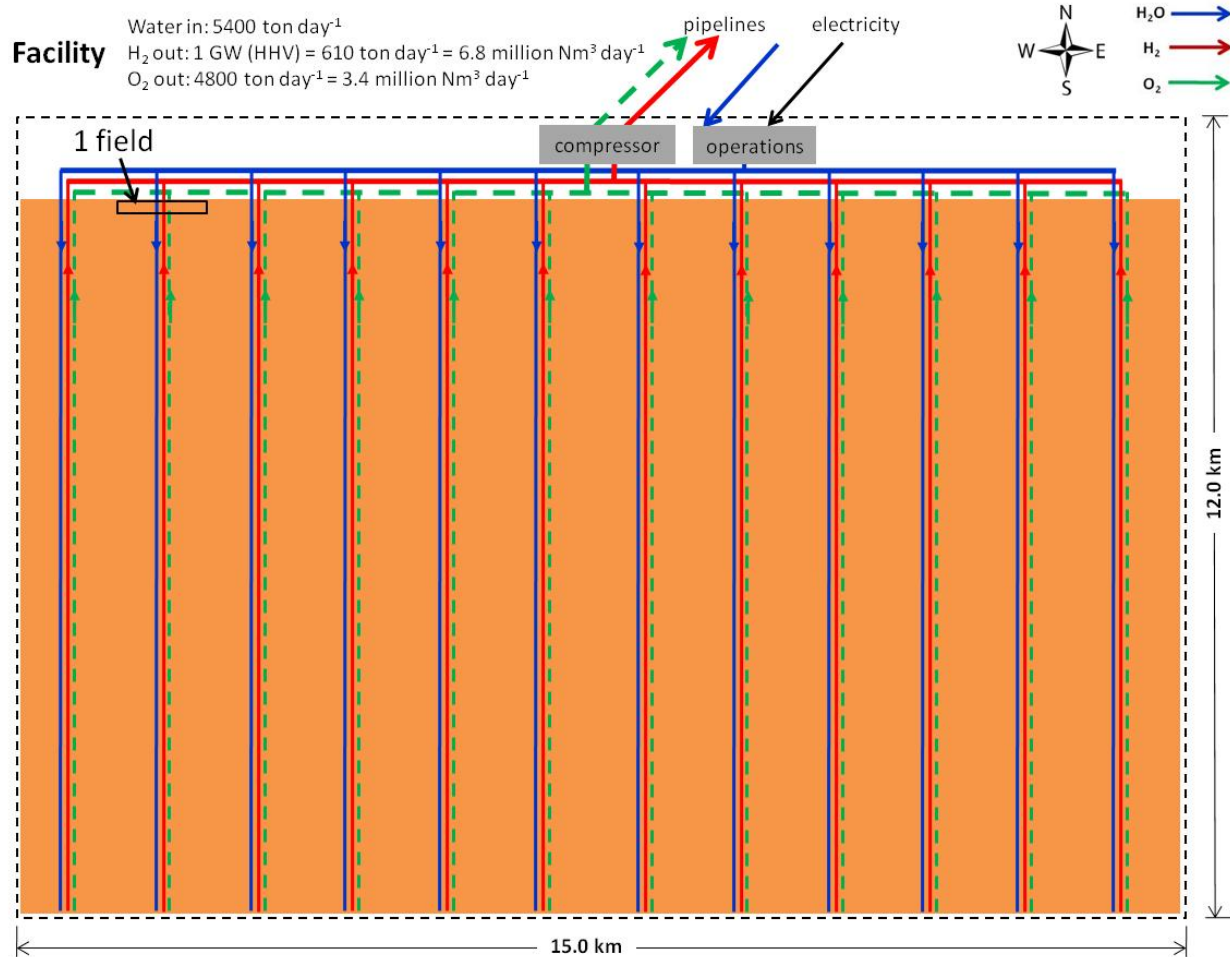

**Figure S5.** Diagram of PEC facility producing 1 GW (annual average) H<sub>2</sub>. Water flow rates do not include water vapor lost with vented O<sub>2</sub>.

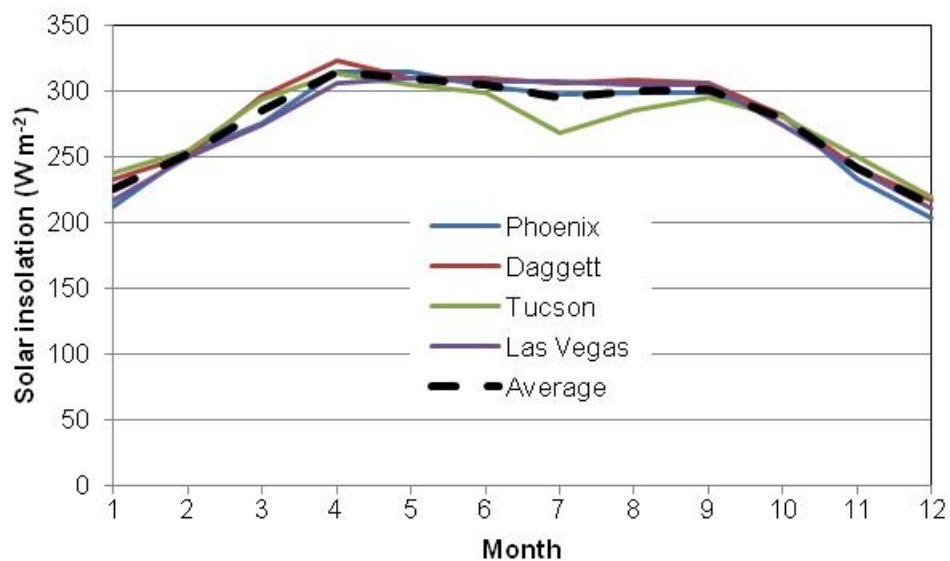

**Figure S6.** Monthly solar insolation ( $\text{W m}^{-2}$ ) at four sites across the U.S. southwest. The assumed insolation on the facility is the average of the four sites, shown as a dashed line.

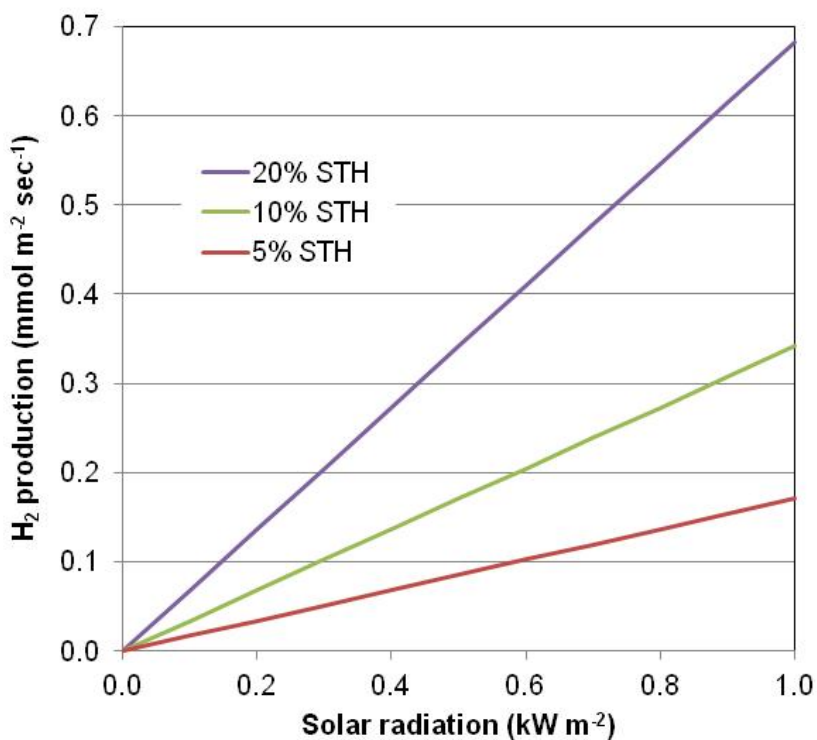

**Figure S7.** Assumed relation between instantaneous solar radiation and  $\text{H}_2$  production.

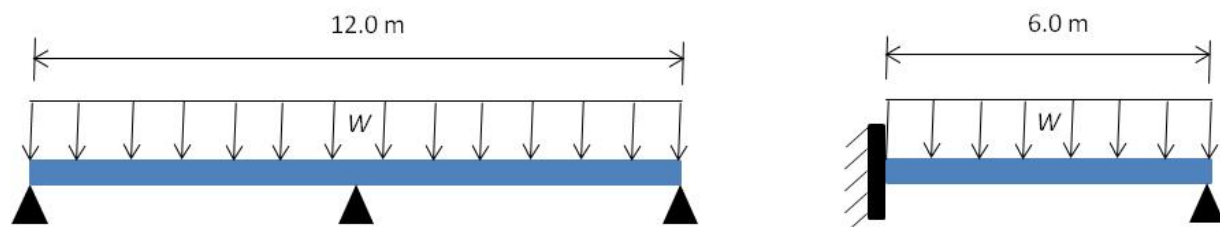

**Figure S8.** Estimation of panel deflection under load. Considering the panel as a uniformly-loaded beam that is simply supported at three points (left), symmetry implies that deflection will be equal to a beam fixed on one end and simply supported on the other (right). Based on Pope,<sup>44</sup> maximum deflection (inches) for such a beam will be:

$$y_{max} = \frac{-0.0054 W L^4}{E I}$$

where  $W$  is the uniform load (pounds inch<sup>-1</sup>),  $L$  is the length of the beam (inch),  $E$  is the modulus of elasticity of the material (psi), and  $I$  is the moment of inertia of the beam (inch<sup>4</sup>). In this deflection analysis we assume the panel is laying flat; the uniform load is composed of the dead load of the steel structure (1.6 pounds inch<sup>-1</sup>) plus the load of the PEC components and electrolyte (4.4 pounds inch<sup>-1</sup>), to which is applied a safety factor multiplier of 3. The length of the (half) panel is 6.0 m or 237 inches. The modulus of elasticity of steel is about  $3.1 \times 10^7$  psi. The moment of inertia of each of the two perimeter steel channel sections (ASTM C4x5.4) is 3.85 inch<sup>4</sup>. These properties yield a maximum calculated deflection of 1.2 inches. The calculated length-to-deflection ratio is about 190, which is marginally acceptable for typical structural solutions. There appears to be significant scope for increasing material use efficiency through creative design that integrates PEC cell materials into a structural solution.

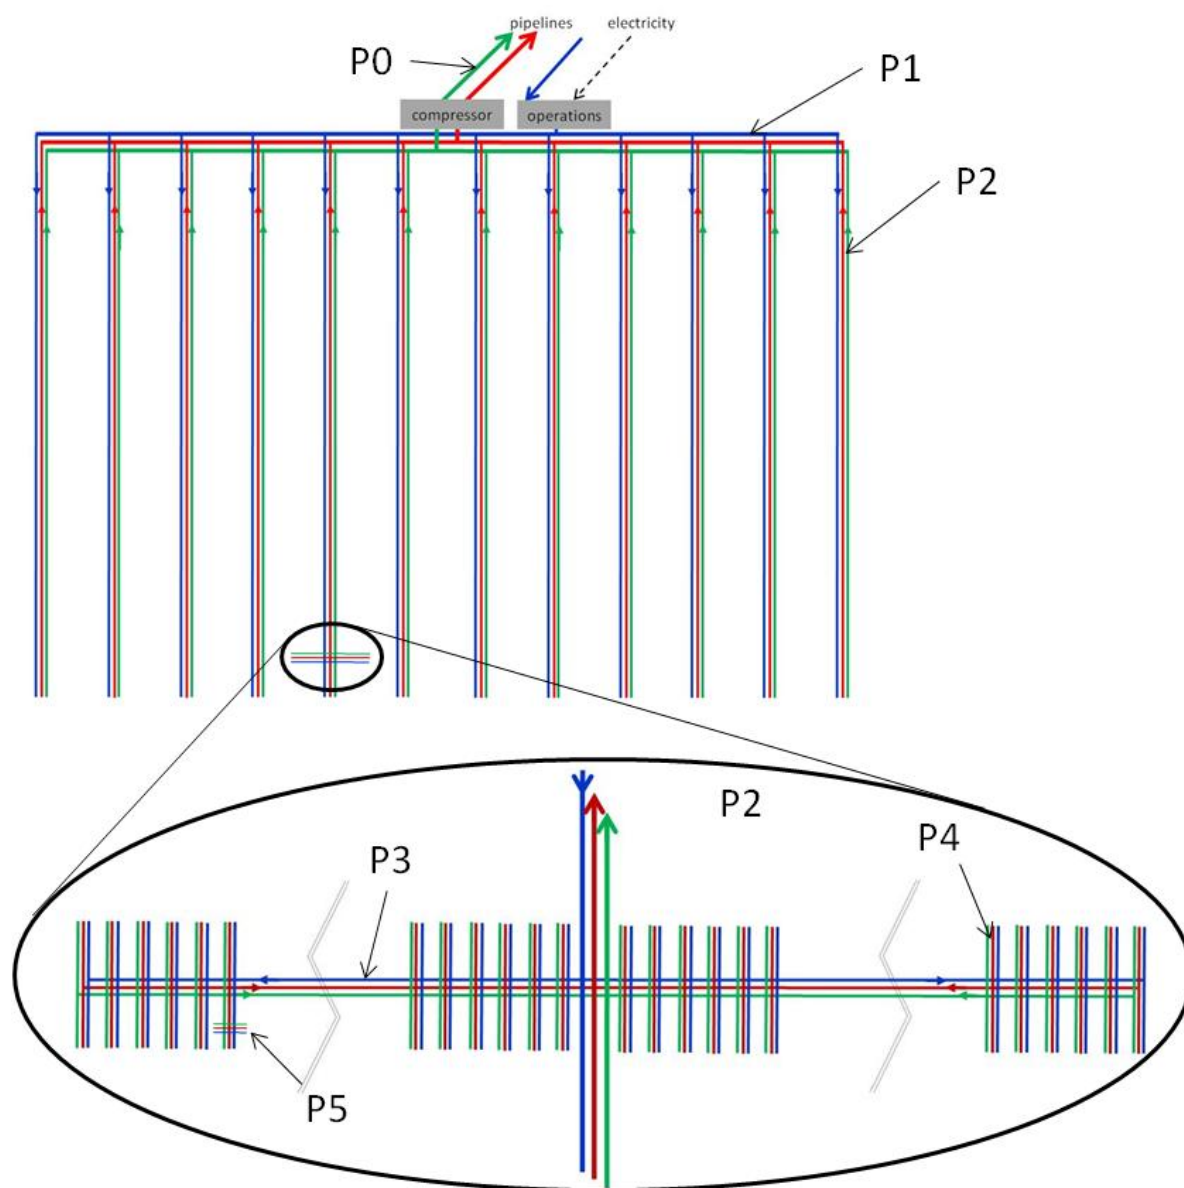

**Figure S9.** Hierarchical piping networks to transport fluids. Water, hydrogen and oxygen conduits are represented by blue, red and green lines, respectively.

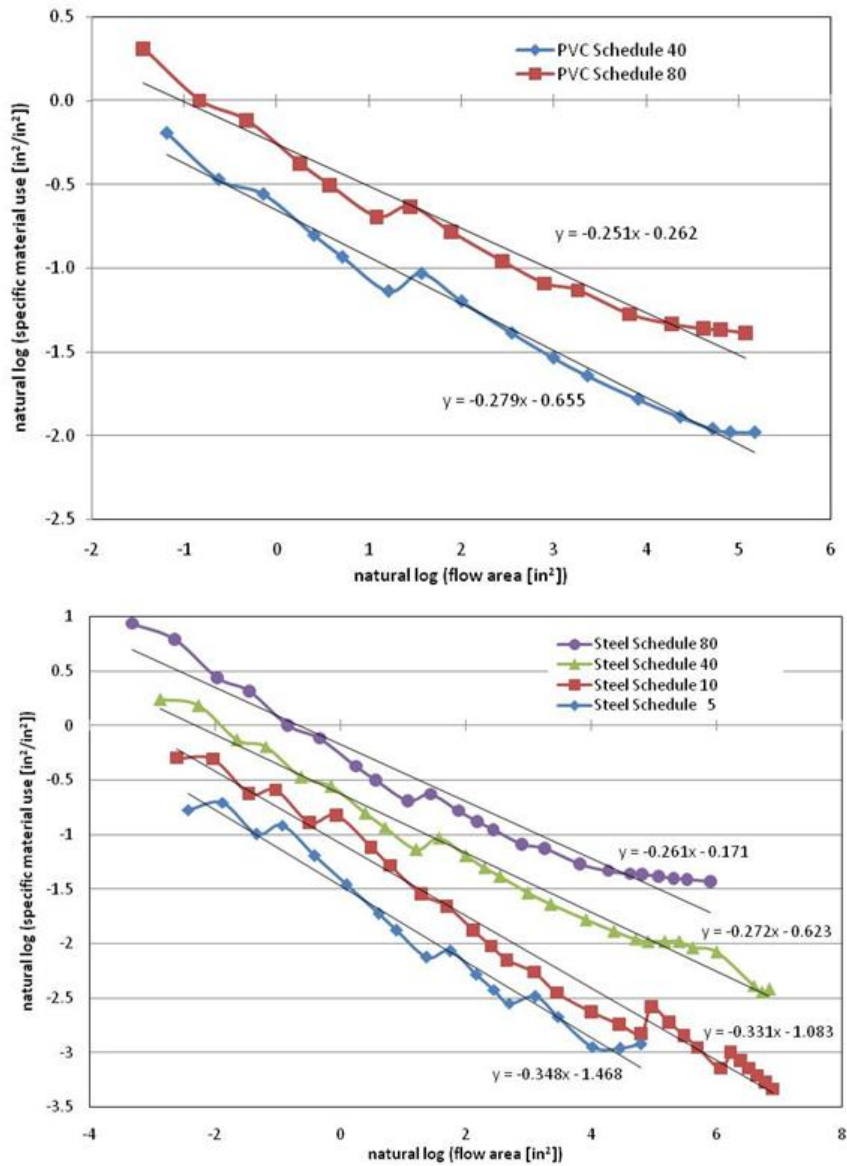

**Figure S10.** Relation between the flow area and specific material use of standard sizes of pipes made of PVC (top) and steel (bottom). Pipe dimensions are based on open-source data reporting agreed standards, namely ASTM D1785 (Poly Vinyl Chloride Plastic Pipe) and ASME B36.10 (Welded and Seamless Wrought Steel Pipe). Pipe sizing in this analysis is based on the fit lines.

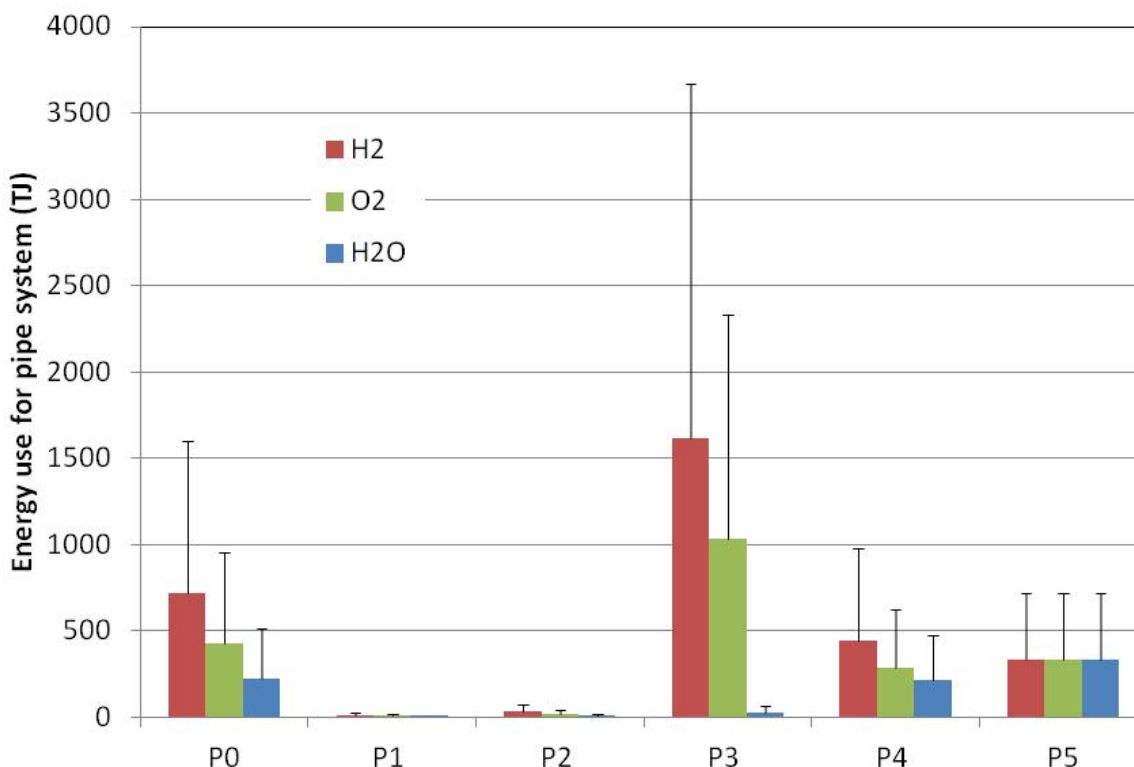

**Figure S11.** Energy use for production of piping system for the gas and liquid flows in the facility ( $\text{H}_2\text{O}$ ,  $\text{H}_2$ ,  $\text{O}_2$ ). Colored bars show energy use for base case PVC pipes, error bars show additional energy use for steel pipes.

### Details of $\text{H}_2$ demand scenarios

Light-duty vehicle travel demand in 2014 is approximately 2.70 trillion miles (EIA 2014). Based on NRC (2013), we assume that average light-duty vehicle hydrogen fuel cell efficiency is 13.5 kg  $\text{H}_2$  per 1000 miles (based on the average of passenger car and light truck efficiencies), roughly 3.5 times more efficient than conventional gasoline engines. This results in an annual demand of 35.4 billion kg  $\text{H}_2$ . Assuming each 1 GW facility produces 222 million kg  $\text{H}_2$  per year, 160 such facilities would be required. By 2050, NRC (2013) projects average fuel cell efficiency will decrease fuel consumption to 7.5 kg  $\text{H}_2$  per 1000 miles, while we project travel demand will increase to 3.76 trillion miles (based on extrapolation of EIA projections through 2040). These combined changes result in a 2050 demand of 28.2 billion kg  $\text{H}_2$ , requiring 127 1 GW facilities to produce it.

EIA (US Energy Information Agency), *Annual Energy Outlook 2014 Early Release*, 2014. Web-accessed at <http://www.eia.gov/forecasts/aeo/er/index.cfm>

National Research Council, *Transitions to Alternative Vehicles and Fuels*, Washington, DC: The National Academies Press, 2013. Web-accessed at [http://www.nap.edu/catalog.php?record\\_id=18264](http://www.nap.edu/catalog.php?record_id=18264)
